# Supplementary material
Source: MDPI journal article supplement (https://www.mdpi.com/2073-4344/12/4/438)
Supplement: s1 [file s1]

# Supplementary Materials

**Table S1.** Structural parameters of optimized models in the N<sub>2</sub>O decomposition process (diameter in Å, angle in °) (The first N<sub>2</sub>O molecule is noted as O1–N1–N2. The second N<sub>2</sub>O molecule is labelled as O2–N3–N4).

| Model                      | Spin  | Cu1-Cu2   | Cu1-O1      | Cu2-O1    | O1-N1  |
|----------------------------|-------|-----------|-------------|-----------|--------|
| Z-CuCu                     | 1     | 2.46      | -           | -         | -      |
| Z-Cu-ONN-Cu                | 1     | 2.65      | 2.11        | 2.24      | 1.22   |
| Z-Cu-ONN-Cu-TS             | 1     | 2.85      | 1.90        | 1.94      | 1.52   |
| Z-Cu-O-N <sub>2</sub> -Cu  | 3     | 2.62      | 1.83        | 1.83      | -      |
| Z-CuOCu                    | 3     | 2.69      | 1.84        | 1.82      | -      |
| Model                      | N1-N2 | ∠O1-N1-N2 | ∠Cu1-O1-Cu2 |           |        |
| Z-CuCu                     | -     | -         | -           |           |        |
| Z-Cu-ONN-Cu                | 1.12  | 178.03    | -           |           |        |
| Z-Cu-ONN-Cu-TS             | 1.12  | 142.98    | 95.67       |           |        |
| Z-Cu-O-N <sub>2</sub> -Cu  | 1.10  | -         | 115.05      |           |        |
| Z-CuOCu                    | -     | -         | 113.83      |           |        |
| Model                      | Spin  | Cu1-Cu2   | Cu1-O1      | Cu2-O1    | Cu1-O2 |
| Z-Cu-O-ONN-Cu              | 3     | 2.7       | 1.84        | 1.81      | -      |
| Z-Cu-O-ONN-Cu-TS           | 3     | 2.8       | 1.84        | 1.82      | -      |
| Z-Cu-OO-N <sub>2</sub> -Cu | 3     | 2.86      | -           | 1.9       | 1.93   |
| Z-Cu-OO-Cu                 | 3     | 2.86      | -           | 1.9       | 1.93   |
| Model                      | O2-N3 | N3-N4     | O1-O2       | ∠O2-N3-N4 |        |
| Z-Cu-O-ONN-Cu              | 1.21  | 1.13      | 3.26        | 178.56    |        |
| Z-Cu-O-ONN-Cu-TS           | 1.64  | 1.11      | 1.83        | 153.52    |        |
| Z-Cu-OO-N <sub>2</sub> -Cu | -     | 1.1       | 1.4         | -         |        |
| Z-Cu-OO-Cu                 | -     | 1.1       | 1.4         | -         |        |

**Table S2.** Structural parameters of optimized models in the NO-NH<sub>3</sub>-SCR process (diameter in Å, angle in °) (The O atom of the Z-2Cu-O is noted as O. The NO is labelled as N2-O2. The NH<sub>3</sub> is shorted as N1-H1-H2-H3).

| Model                                       | Spin | Cu1-Cu2 | Cu1-O | Cu2-O | N1-Cu2     | N2-Cu1 |
|---------------------------------------------|------|---------|-------|-------|------------|--------|
| Z-CuOCu-NH <sub>3</sub>                     | 3    | 2.81    | 1.81  | 1.83  | 2.08       | -      |
| Z-Cu-OH-NH <sub>2</sub> -Cu-TS              | 4    | 2.78    | 1.86  | 1.93  | 2          | -      |
| Z-Cu-OH-NH <sub>2</sub> -Cu                 | 4    | 2.92    | 1.92  | 1.93  | 2.08       | -      |
| Z-Cu-OH-NH <sub>2</sub> -NO-Cu              | 4    | 3       | 1.9   | 1.93  | 2.09       | 2.64   |
| Z-Cu-OH-NH <sub>2</sub> -NO-Cu-TS           | 4    | 2.9     | 1.89  | 2     | 2.94       | 2.01   |
| Z-Cu-OH-NH-NOH-Cu                           | 4    | 2.92    | 1.9   | 1.95  | 2.81       | 1.97   |
| Z-Cu-OH-NH-NOH-Cu-TS                        | 4    | 3.34    | 1.9   | 1.91  | -          | 2.3    |
| Z-Cu-OH-N <sub>2</sub> -H <sub>2</sub> O-Cu | 4    | 3.15    | 1.88  | 1.91  | -          | 4.41   |
| Z-CuOHCu                                    | 2    | 2.81    | 1.9   | 1.92  | -          | -      |
| Model                                       | H1-O | H1-N1   | N1-N2 | O2-H1 | ∠Cu1-O-Cu2 |        |
| Z-CuOCu-NH <sub>3</sub>                     | -    | -       | -     | -     | 100.98     |        |
| Z-Cu-OH-NH <sub>2</sub> -Cu-TS              | 1.23 | 1.29    | -     | -     | 94.47      |        |
| Z-Cu-OH-NH <sub>2</sub> -Cu                 | 0.97 | -       | -     | -     | 98.69      |        |
| Z-Cu-OH-NH <sub>2</sub> -NO-Cu              | 0.97 | -       | -     | -     | 100.19     |        |
| Z-Cu-OH-NH <sub>2</sub> -NO-Cu-TS           | 0.97 | -       | 1.43  | 1.26  | 96.16      |        |
| Z-Cu-OH-NH-NOH-Cu                           | 0.97 | -       | 1.33  | 0.98  | 99.09      |        |
| Z-Cu-OH-NH-NOH-Cu-TS                        | 0.97 | -       | 1.18  | 0.97  | 122.56     |        |
| Z-Cu-OH-N <sub>2</sub> -H <sub>2</sub> O-Cu | 0.97 | -       | 1.1   | 0.97  | 112.46     |        |

**Table S3.** Structural parameters of optimized models in the NO<sub>2</sub>-NH<sub>3</sub>-SCR process (diameter in Å, angle in °) (The O atom of the Z-2Cu-OH is noted as O. The NO<sub>2</sub> is labelled as O1-N1-O2. The NH<sub>3</sub> is shorted as N2-H1-H2-H3).

| Model                                           | Spin   | Cu1-Cu2 | Cu2-O | Cu1-O | O-H  | ∠Cu1-O-Cu2 | N2-Cu2 |
|-------------------------------------------------|--------|---------|-------|-------|------|------------|--------|
| Z-Cu-OH-NO <sub>2</sub> -Cu                     | 3      | 2.88    | 1.94  | 1.90  | -    | 97.14      | -      |
| Z-Cu-OH-NO <sub>2</sub> -NH <sub>3</sub> -Cu    | 3      | 3.12    | 1.96  | 1.89  | 0.97 | 108.21     | 2.15   |
| Z-Cu-OH-NO <sub>2</sub> -NH <sub>3</sub> -Cu-TS | 3      | 2.63    | 2.00  | 2.00  | 0.98 | 82.07      | -      |
| Z-Cu-NH <sub>4</sub> NO <sub>2</sub> -Cu        | 3      | 3.31    | -     | 1.95  | 0.97 | -          | -      |
| Z-Cu-NH <sub>2</sub> NO-Cu                      | 3      | 2.75    | 1.98  | 1.95  | -    | 88.94      | -      |
| Model                                           | O1-Cu2 | N2-Cu1  | H1-O  | N2-H1 | N-N  | O-N        | N-O    |
| Z-Cu-OH-NO <sub>2</sub> -Cu                     | 2.09   | -       | -     | -     | -    | -          | -      |
| Z-Cu-OH-NO <sub>2</sub> -NH <sub>3</sub> -Cu    | 2.18   | -       | -     | -     | -    | -          | -      |
| Z-Cu-OH-NO <sub>2</sub> -NH <sub>3</sub> -Cu-TS | 2.93   | -       | 1.18  | 1.34  | -    | -          | -      |
| Z-Cu-NH <sub>4</sub> NO <sub>2</sub> -Cu        | 1.94   | -       | 1.00  | -     | 1.43 | -          | -      |
| Z-Cu-NH <sub>2</sub> NO-Cu                      | -      | -       | -     | -     | 1.51 | 1.37       | 1.15   |

**Table S4.** Structural parameters of optimized models of NO<sub>x</sub>-assisted reduction of active center (diameter in Å, angle in °) (The NO is labelled as N1-O1. The NO<sub>2</sub> is noted as O2-N2-O3.).

| Model                         | Spin       | Cu1-Cu2 | Cu1-O     | Cu2-O | ∠Cu1-O-Cu2 | N1-O | N1-O1 |
|-------------------------------|------------|---------|-----------|-------|------------|------|-------|
| Z-Cu-O-NO-Cu-TS               | 2          | 2.66    | 1.92      | 1.89  | 88.34      | 1.58 | 1.20  |
| Z-Cu-ONO-Cu                   | 2          | 2.64    | 1.92      | -     | -          | 1.43 | 1.23  |
| Model                         | Spin       | Cu1-Cu2 | Cu1-O     | Cu2-O | O2-Cu2     | O-O2 | N2-O2 |
| Z-Cu-O-NO <sub>2</sub> -Cu-TS | 4          | 2.78    | 1.87      | 1.94  | -          | 1.70 | 1.85  |
| Z-Cu-OO-NO-Cu                 | 4          | 2.86    | 1.90      | -     | 1.93       | 1.40 | -     |
| Model                         | ∠Cu1-O-Cu2 |         | ∠O2-N2-O3 |       | N2-O3      |      |       |
| Z-Cu-O-NO <sub>2</sub> -Cu-TS | 93.72      |         | 111.69    |       | 1.16       |      |       |
| Z-Cu-OO-NO-Cu                 | -          |         | -         |       | 1.16       |      |       |
